# Supplementary material for: Evaluation of the Meibomian Glands Using the Tear Interferometer Wearing Orthokeratology Lenses
Source: Research Square preprint supplement (doi:10.21203/rs.3.rs-885269/v1), 2021-09-17
Supplement: Supplementary file 1 [file ddd244b03d281ded6262dde9.docx]

**Supplementary Table S1. The median and range values for demographic characteristics for without (Control group) and with (Ortho-K group) orthokeratology treatment in Korean children.**

|  | Control group (n=79) | | Ortho-K group (n=53) | |
| --- | --- | --- | --- | --- |
|  | Median | Range* | Median | Range* |
| Age (years)  BCVA (logMAR)  Axial length (mm)  Astigmatism (diopter) | 9  0  24.56  1.2 | 7-14  0-0.52  23.07-27.62  0.1-4.1 | 11  0.1  24.8  1.3 | 8-17  0-0.3  23.08-26.36  0.2-3.8 |

Ortho-K, Orthokeratology; BCVA,distance best-corrected visual acuity; logMAR, logarithm of the minimum angle of resolution

*Range; maximum to minimum
